# Supplementary material for: Facile synthesis of heterogeneous macrocycles for intramolecular energy transfer
Source: Royal Society of Chemistry journal article supplement (doi:10.1039/d2cc04673c), 2022-01-01
Supplement: d2cc04673c1.pdf [file d2cc04673c1.pdf]

## Supporting Information

### Facile Synthesis of Heterogeneous Macrocycles for Intramolecular Energy Transfer

*Ao Liu<sup>+,a</sup>, Xin Meng<sup>+,a</sup>, Chen-Chen Shen,<sup>a</sup> Zhi-Yuan Zhang,<sup>a</sup> and Chunju Li<sup>\*,a</sup>*

§. Tianjin Key Laboratory of Structure and Performance for Functional Molecules,  
College of Chemistry, Tianjin Normal University, Tianjin 300387 (P. R. China).

#### Corresponding Author

\*E-mail: [cjli@shu.edu.cn](mailto:cjli@shu.edu.cn)

## Table of Contents

|                                                                 |       |
|-----------------------------------------------------------------|-------|
| Section I. Materials/Methods/Instrumentation .....              | 2     |
| Section II. Synthetic Protocols of MOH T1OH T2OH T3OH. ....     | 3-17  |
| Section III. Photophysical Properties of T T1OH T2OH T3OH ..... | 18-24 |
| Section IV. References .....                                    | 25    |

## Section I. Materials/Methods/Instrumentation

All reagents and solvents were commercially available and used without further purification, unless otherwise noted.  $^1\text{H}$  and  $^{13}\text{C}$  NMR spectra were recorded on Bruker Avance III 400 MHz. High-resolution mass spectra (HRMS) were determined on Bruker Daltonics Inc. APEXIII 7.0 TESLA FTMS. Melting points were obtained on an X-4 digital melting point apparatus without correction. The single crystal X-ray data were measured by direct methods using Bruker D8 VENTURE and Bruker SMARE APEX II. UV-Vis titration and UV-Vis were received by Agilent Cary 100 UV-Vis. Fluorescence spectra and lifetimes were measured on FLS1000. Fluorescence quantum efficiencies were measured on HAMAMATSU C9920-02 by absolute method. The geometry optimization of **T2OH** and **T3OH** were performed by using Mopac2016 program<sup>[1]</sup> with PM7<sup>[2]</sup> level.

## Section II. Synthetic Protocols.

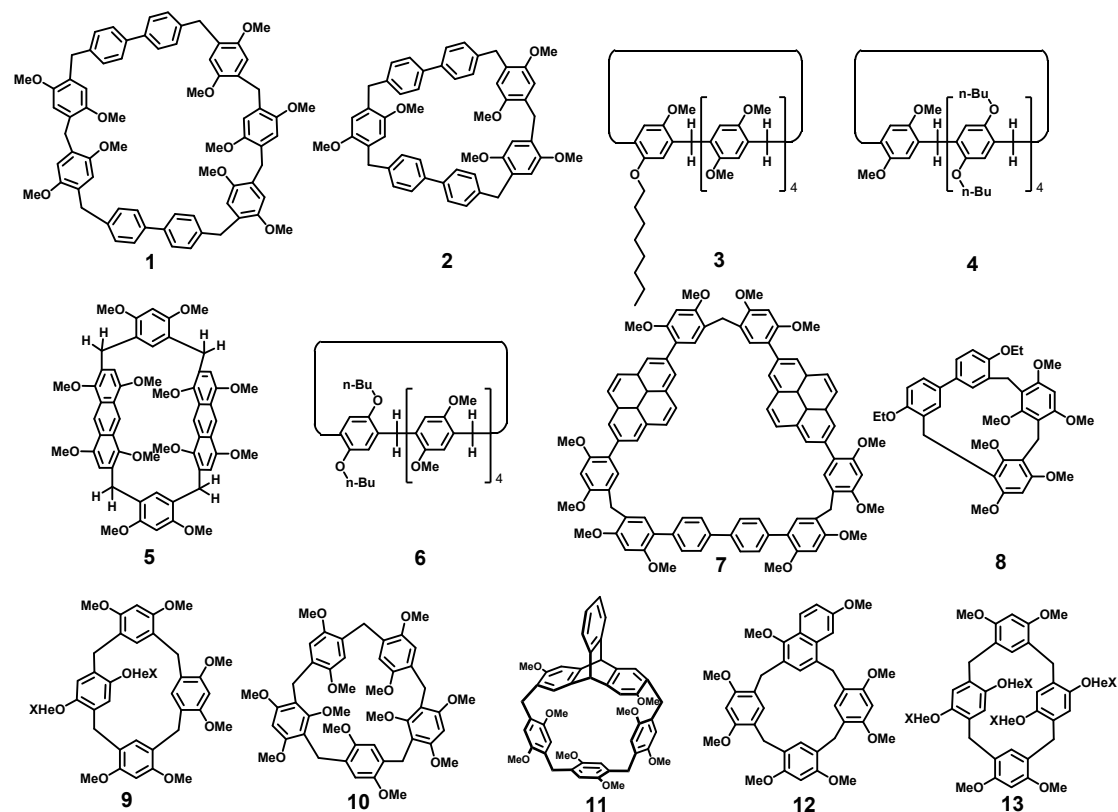

**Figure S1.** The structures of reported heterogeneous macrocyclic arenes.

**Table S1.** The yields of reported heterogeneous macrocyclic arenes and our works.

| Entry | Name        | Yields (%) | References |
|-------|-------------|------------|------------|
| 1     | <b>1</b>    | 0.1        | [4]        |
| 2     | <b>2</b>    | 0.1        | [4]        |
| 3     | <b>3</b>    | 9          | [5]        |
| 4     | <b>4</b>    | 9          | [7]        |
| 5     | <b>5</b>    | 10         | [6]        |
| 6     | <b>6</b>    | 16         | [7]        |
| 7     | <b>7</b>    | 24         | [8]        |
| 8     | <b>8</b>    | 25         | [9]        |
| 9     | <b>9</b>    | 26         | [10]       |
| 10    | <b>10</b>   | 35         | [10]       |
| 11    | <b>11</b>   | 37         | [11]       |
| 12    | <b>12</b>   | 47         | [12]       |
| 13    | <b>13</b>   | 53         | [10]       |
| 14    | <b>T1OH</b> | 43         | This work  |
| 15    | <b>T2OH</b> | 31         | This work  |
| 16    | <b>T3OH</b> | 94         | This work  |

|    |                         |            |           |
|----|-------------------------|------------|-----------|
| 17 | <b>T1OH, T2OH, T3OH</b> | 33, 26, 30 | This work |
|----|-------------------------|------------|-----------|

The first compounds **T** and **M** were synthesized by using the method from the reference.<sup>[13]</sup>

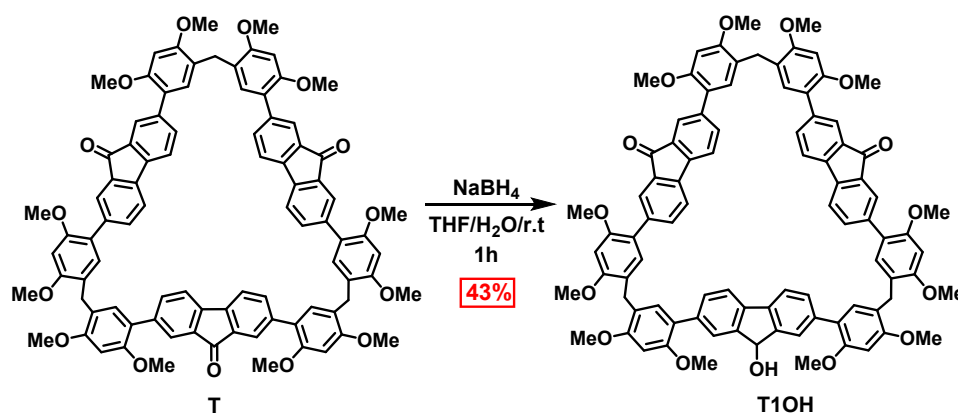

**Scheme S1.** Synthesis of heterogeneous macrocycle **T1OH**.

**T1OH.** To a solution of **T** (0.30 g, 0.22 mmol) in 150 mL THF and 5 mL water (30:1) was added NaBH<sub>4</sub> (12 mg, 0.32 mmol) that was dispersed in 5 mL THF and stirred at 25 °C for 1 h. After quenching with water and extracting with CH<sub>2</sub>Cl<sub>2</sub>, the solvents was removed under vacuum, and the residue was purified by column chromatography (silica gel, eluent: ethyl acetate/CH<sub>2</sub>Cl<sub>2</sub> 1:60) to afford product **T1OH** as an orange solid (0.13 g, 43 %). M. p. 261-262 °C. <sup>1</sup>H NMR (400 MHz, CDCl<sub>3</sub>, ppm): δ 7.75 (d, *J* = 6.2 Hz, 6H), 7.60 (dd, *J* = 7.7, 1.6 Hz, 2H), 7.45 (td, *J* = 16.2, 8.4, 4.9 Hz, 12H), 7.00 (d, *J* = 1.2 Hz, 1H), 6.92 (s, 3H), 6.60 – 6.54 (m, 6H), 5.62 (s, 1H), 3.92 (s, 6H), 3.90 (s, 18H), 3.83 (s, 18H); <sup>13</sup>C NMR (100 MHz, CDCl<sub>3</sub>, ppm): δ 194.61 (s), 158.24 (d, *J* = 4.0 Hz), 157.94 (s), 155.93 (d, *J* = 9.1 Hz), 145.82 (s), 142.54 (s), 139.49 (d, *J* = 6.8 Hz), 138.36 (s), 138.02 (s), 135.60 (d, *J* = 8.5 Hz), 134.48 (d, *J* = 5.0 Hz), 132.20 (s), 131.53 (d, *J* = 10.5 Hz), 130.31 (s), 126.34 (s), 125.62 (d, *J* = 5.1 Hz), 122.70 (s), 121.42 (dd, *J* = 27.4, 19.2 Hz), 120.02 (d, *J* = 5.6 Hz), 119.57 (s), 96.11 (s), 95.87 (s), 56.26 – 55.85 (m), 27.77 (s). HRMS (*m/z*): calcd. for C<sub>90</sub>H<sub>74</sub>O<sub>15</sub><sup>+</sup>: 1394.5028 [*M*]<sup>+</sup>; found, 1394.5015 [*M*]<sup>+</sup>.

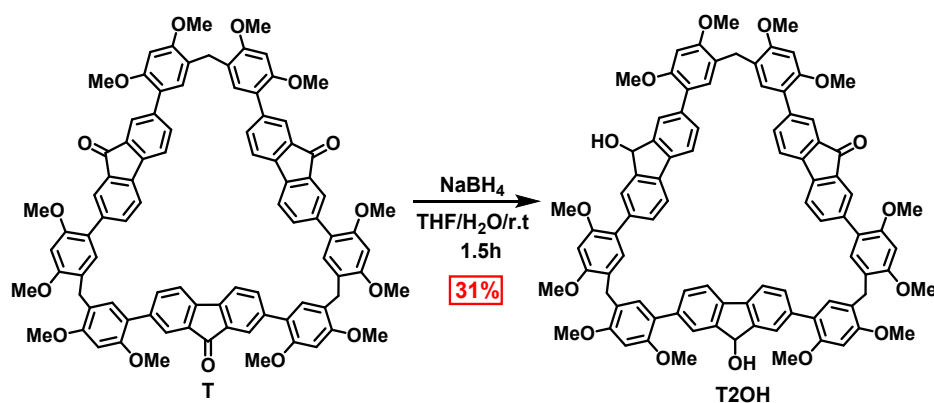

**Scheme S2.** Synthesis of heterogeneous macrocycle **T2OH**.

**T2OH.** To a solution of **T** (0.30 g, 0.22 mmol) in 150 mL THF and 5 mL water (30:1) was added  $\text{NaBH}_4$  (20 mg, 0.53 mmol) and stirred at 25 °C for 90 minutes. After quenching with water and extracting with  $\text{CH}_2\text{Cl}_2$ , the solvents were removed under vacuum, and the residue was purified by column chromatography (silica gel, eluent: ethyl acetate/ $\text{CH}_2\text{Cl}_2$  1:60 and gradually changed to ethyl acetate/ $\text{CH}_2\text{Cl}_2$  1:30) to afford **T2OH** as an orange solid (93 mg, 31 %). M. p. 267-269 °C.  $^1\text{H}$  NMR (400 MHz,  $\text{CDCl}_3$ , ppm) :  $\delta$  7.73 (d,  $J$  = 9.1 Hz, 6H), 7.59 (d,  $J$  = 7.7 Hz, 4H), 7.49 (d,  $J$  = 7.7 Hz, 2H), 7.46 – 7.40 (m, 6H), 6.97 (d,  $J$  = 10.8 Hz, 4H), 6.90 (s, 2H), 6.60 – 6.55 (m, 6H), 5.61 (d,  $J$  = 4.7 Hz, 2H), 3.93 (d,  $J$  = 4.9 Hz, 6H), 3.90 (s, 18H), 3.84 (d,  $J$  = 4.2 Hz, 18H);  $^{13}\text{C}$  NMR (100 MHz,  $\text{CDCl}_3$ , ppm):  $\delta$  194.59 (s), 158.28 (s), 157.98 (d,  $J$  = 3.7 Hz), 155.98 (d,  $J$  = 10.1 Hz), 145.82 (d,  $J$  = 7.5 Hz), 142.56 (s), 139.58 (s), 138.37 (s), 138.12 (d,  $J$  = 6.5 Hz), 135.64 (s), 134.55 (s), 132.21 (d,  $J$  = 11.5 Hz), 131.52 (s), 130.39 (d,  $J$  = 7.9 Hz), 126.33 (d,  $J$  = 5.4 Hz), 125.60 (s), 122.78 (s), 121.75 (s), 121.54 (d,  $J$  = 2.1 Hz), 121.25 (s), 119.94 (s), 119.53 (d,  $J$  = 6.0 Hz), 96.52 – 96.34 (m), 96.09 (d,  $J$  = 23.4 Hz), 56.37 – 55.84 (m), 27.84 (s). HRMS ( $m/z$ ): calcd. for  $\text{C}_{90}\text{H}_{76}\text{O}_{15}^+$ : 1396.5184 [ $\text{M}$ ] $^+$ ; found, 1396.5181 [ $\text{M}$ ] $^+$ .

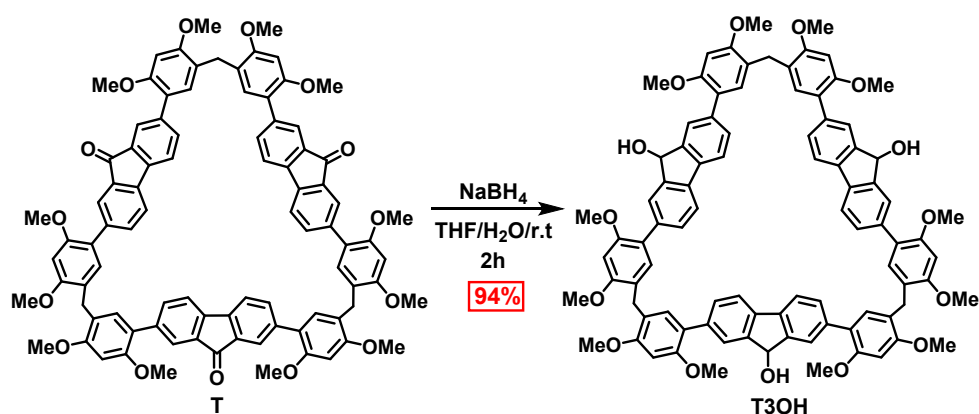

**Scheme S3.** Synthesis of macrocycle **T3OH**.

**T3OH.** To a solution of **T** (0.30 g, 0.22 mmol) in 30 mL THF and 1 mL water (30:1) was added NaBH<sub>4</sub> (0.17 g, 4.5 mmol) and stirred at 25 °C for 2 h. After quenching with water and extracting with CH<sub>2</sub>Cl<sub>2</sub>, the solvents was removed under vacuum, and the residue was purified by column chromatography (silica gel, eluent: ethyl acetate/CH<sub>2</sub>Cl<sub>2</sub> 1:20) to afford product **T3OH** as a yellow solid (0.28 g, 94 %). M. p. 281-283 °C. <sup>1</sup>H NMR (400 MHz, CDCl<sub>3</sub>): δ 7.71 (s, 6H), 7.58 (d, *J* = 7.8 Hz, 6H), 7.43 (d, *J* = 7.9 Hz, 6H), 6.97 (s, 6H), 6.58 (s, 6H), 5.60 (d, *J* = 5.0 Hz, 3H), 3.94 (s, 6H), 3.90 (s, 18H), 3.83 (s, 18H); <sup>13</sup>C NMR (100 MHz, CDCl<sub>3</sub>, ppm): δ 157.94, 155.88, 145.76, 138.33, 138.12, 132.14, 130.41, 126.27, 122.65, 121.42, 121.39, 119.48, 96.04, 56.10, 55.98, 27.87. HRMS (*m/z*): calcd. for C<sub>90</sub>H<sub>78</sub>O<sub>15</sub><sup>+</sup>: 1398.5341 [*M*]<sup>+</sup>; found, 1398.5341 [*M*]<sup>+</sup>.

**Table S2.** Screening of reaction conditions for heterogeneous macrocycles by post-modification.

| Entry | NaBH <sub>4</sub><br>(equiv) <sup>[a]</sup> | Reaction time<br>(min) | Yields (%)  |             |                  |
|-------|---------------------------------------------|------------------------|-------------|-------------|------------------|
|       |                                             |                        | <b>T1OH</b> | <b>T2OH</b> | <b>T3OH</b>      |
| 1     | 1                                           | 10                     | 5           | 2           | – <sup>[b]</sup> |
| 2     | 1                                           | 20                     | 10          | 2           | 1                |
| 3     | 1                                           | 60                     | 10          | 1           | 2                |

|    |     |     |    |    |    |
|----|-----|-----|----|----|----|
| 4  | 1.5 | 30  | 20 | 6  | 5  |
| 5  | 1.5 | 60  | 43 | 10 | 8  |
| 6  | 1.5 | 90  | 30 | 19 | 11 |
| 7  | 2.5 | 30  | 24 | 9  | 9  |
| 8  | 2.5 | 60  | 38 | 27 | 10 |
| 9  | 2.5 | 90  | 22 | 31 | 20 |
| 10 | 2.5 | 120 | 16 | 23 | 34 |
| 11 | 3   | 30  | 25 | 11 | 18 |
| 12 | 3   | 60  | 33 | 26 | 30 |
| 13 | 3   | 90  | 21 | 20 | 48 |
| 14 | 5   | 90  | 19 | 13 | 46 |
| 15 | 5   | 120 | 10 | 6  | 62 |
| 16 | 5   | 240 | 3  | 2  | 76 |
| 17 | 10  | 60  | 10 | 3  | 63 |
| 18 | 10  | 120 | 4  | 2  | 75 |
| 19 | 10  | 240 | 1  | 1  | 90 |
| 20 | 20  | 60  | 6  | 4  | 84 |
| 21 | 20  | 120 | 0  | 0  | 94 |
| 22 | 20  | 180 | 0  | 0  | 94 |

a: The reductant is NaBH<sub>4</sub> and solvent is THF/ H<sub>2</sub>O (30: 1) which is the optimal condition for the reduction of fluorenone.<sup>[3]</sup> b: Not detected.

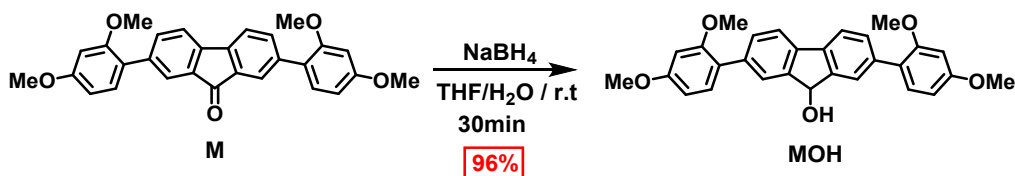

**Scheme S4.** Synthesis of monomer **MOH**.

**MOH.** To a solution of **M** (0.50 g, 1.1 mmol) in 90 mL THF and 3 mL water (30:1) was added NaBH<sub>4</sub> (0.13 g, 4.4 mmol) and stirred at 25 °C for 30 minutes. After quenching with water and extracting with CH<sub>2</sub>Cl<sub>2</sub>, the solvents was removed under vacuum to afford the product **MOH** as a white solid (0.48 g, 96 %).<sup>1</sup> M. p. 182-183 °C. <sup>1</sup>H NMR (400 MHz, DMSO-*d*<sub>6</sub>, ppm): δ 7.75 (d, *J* = 7.9 Hz, 2H), 7.64 (s, 2H), 7.45 (dd, *J* = 7.8, 1.3 Hz, 2H), 7.27 (d, *J* = 8.4 Hz, 2H), 6.69 (d, *J* = 2.3 Hz, 2H), 6.64 (dd, *J* = 8.4, 2.4 Hz, 2H), 5.84 (s, 1H), 5.53 (s, 1H), 3.82 (s, 6H), 3.79 (s, 6H); <sup>13</sup>C NMR (100

MHz, DMSO-*d*<sub>6</sub>, ppm):  $\delta$  160.05, 157.20, 146.87, 137.53, 137.14, 130.86, 129.40, 125.77, 122.62, 119.35, 105.35, 99.01, 73.66, 55.60, 55.29. calcd. for C<sub>29</sub>H<sub>26</sub>O<sub>5</sub><sup>+</sup>: 454.1780 [M]<sup>+</sup>; found, 454.1773 [M]<sup>+</sup>.

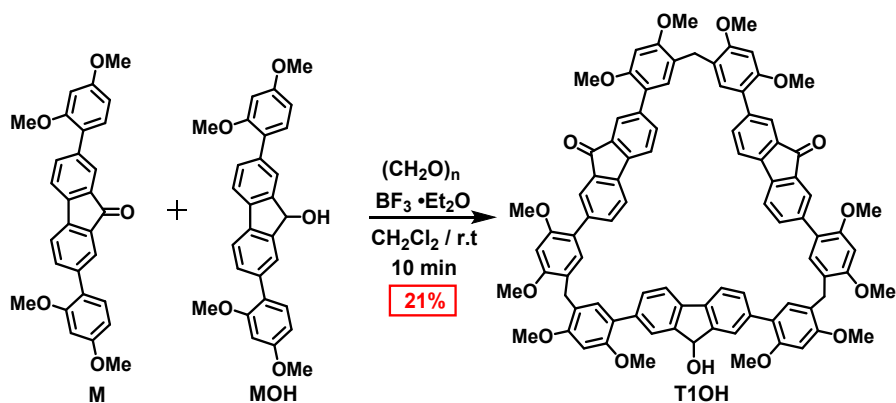

**Scheme S5.** Synthesis of macrocycle **T1OH**.

**T1OH.** A mixture of **M** (0.40 g, 0.88 mmol), **MOH** (0.20 g, 0.44 mmol) and paraformaldehyde (0.30 g, 10 mmol) in CH<sub>2</sub>Cl<sub>2</sub> (100 mL) was added boron trifluoride diethyl etherate (0.60 mL, 5.07 mmol) and stirred at 25 °C for 10 minutes. After quenching by 50 mL water, the water phase was removed and washed with saturated NaHCO<sub>3</sub> solution two times. Remove the water in the organic phase through anhydrous sodium sulfate and evaporated. The residue was purified by column chromatography on silica gel (ethyl acetate/CH<sub>2</sub>Cl<sub>2</sub> 1:60) to afford **T1OH** (43 mg, 21 %).

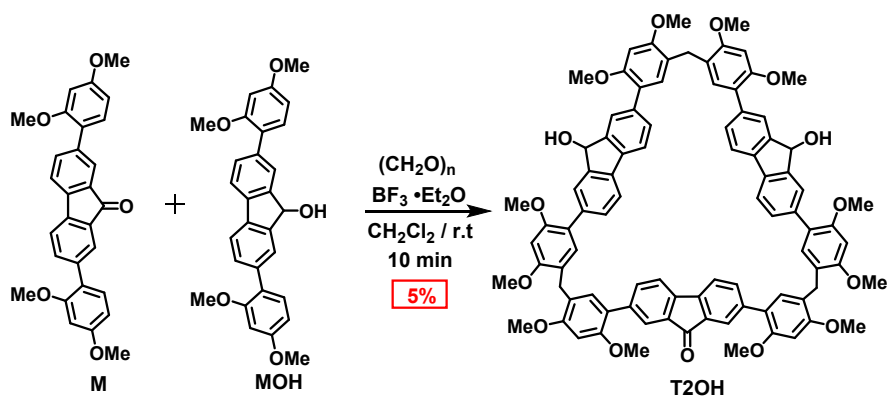

**Scheme S6.** Synthesis of macrocycle **T2OH**.



**T2OH.** To the solution of **M** (0.20 g, 0.44 mmol), **MOH** (0.40 g, 0.88 mmol) and paraformaldehyde (0.30 g, 10 mmol) in DCM (100 mL) was added boron trifluoride diethyl etherate (0.60 mL, 5.1 mmol) and stirred at 25 °C for 10 minutes. After quenching by 50 mL water, the water phase was removed and washed with saturated NaHCO<sub>3</sub> solution two times. Remove the water in the organic phase through anhydrous sodium sulfate and evaporated. The residue was purified by column chromatography on silica gel (ethyl acetate/CH<sub>2</sub>Cl<sub>2</sub> 1:30 to afford **T2OH** (10 mg, 5.0 %).

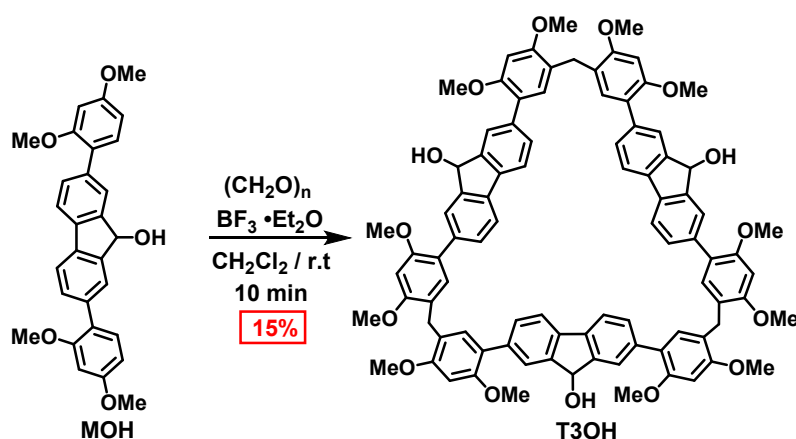

**Scheme S7.** Synthesis of macrocycle **T3OH**.

**T3OH.** To the solution of **MOH** (0.40 g, 0.88 mmol) and paraformaldehyde (0.30 g, 10 mmol) in DCM (100 mL) was added boron trifluoride diethyl etherate (0.60 mL, 5.1 mmol) and stirred at 25 °C for 10 minutes. After quenching by 50 mL water, the water phase was removed and washed with saturated NaHCO<sub>3</sub> solution two times. Remove the water in the organic phase through anhydrous sodium sulfate and evaporated. The residue was purified by column chromatography on silica gel (silica gel, eluent: ethyl acetate/CH<sub>2</sub>Cl<sub>2</sub> 1:20) to afford **T3OH** (60 mg, 15 %).

**Table S3.** Screening of reaction conditions for heterogeneous macrocycles by one-pot co-cyclization.

| Entry | M<br>(equiv) | MOH<br>(equiv) | Catalysts                          | Reaction<br>time<br>(min) | Yields(%)<br>T1OH | Yields(%)<br>T2OH | Yields(%)<br>T3OH |
|-------|--------------|----------------|------------------------------------|---------------------------|-------------------|-------------------|-------------------|
| 1     | 2            | 1              | BF <sub>3</sub> •Et <sub>2</sub> O | 5                         | 12                | 1                 | 0                 |
| 2     | 2            | 1              | BF <sub>3</sub> •Et <sub>2</sub> O | 10                        | 21                | 3                 | 0.1               |
| 3     | 2            | 1              | BF <sub>3</sub> •Et <sub>2</sub> O | 20                        | 11                | 2                 | 0.1               |
| 4     | 1            | 2              | BF <sub>3</sub> •Et <sub>2</sub> O | 5                         | 1                 | 2                 | 0.1               |
| 5     | 1            | 2              | BF <sub>3</sub> •Et <sub>2</sub> O | 10                        | 2                 | 5                 | 1                 |
| 6     | 1            | 2              | BF <sub>3</sub> •Et <sub>2</sub> O | 20                        | 1                 | 2                 | 0.5               |
| 5     | 0            | 3              | BF <sub>3</sub> •Et <sub>2</sub> O | 5                         | 0                 | 0                 | 8                 |
| 6     | 0            | 3              | BF <sub>3</sub> •Et <sub>2</sub> O | 10                        | 0                 | 0                 | 15                |
| 7     | 0            | 3              | BF <sub>3</sub> •Et <sub>2</sub> O | 20                        | 0                 | 0                 | 9                 |
| 8     | 2            | 1              | CF <sub>3</sub> SO <sub>3</sub> H  | 1                         | –[a]              | –[a]              | –[a]              |
| 9     | 2            | 1              | FeCl <sub>3</sub>                  | 60                        | –[b]              | –[b]              | –[b]              |
| 10    | 2            | 1              | AlCl <sub>3</sub>                  | 60                        | –[b]              | –[b]              | –[b]              |

a: Only polymer was found. b: Not react.

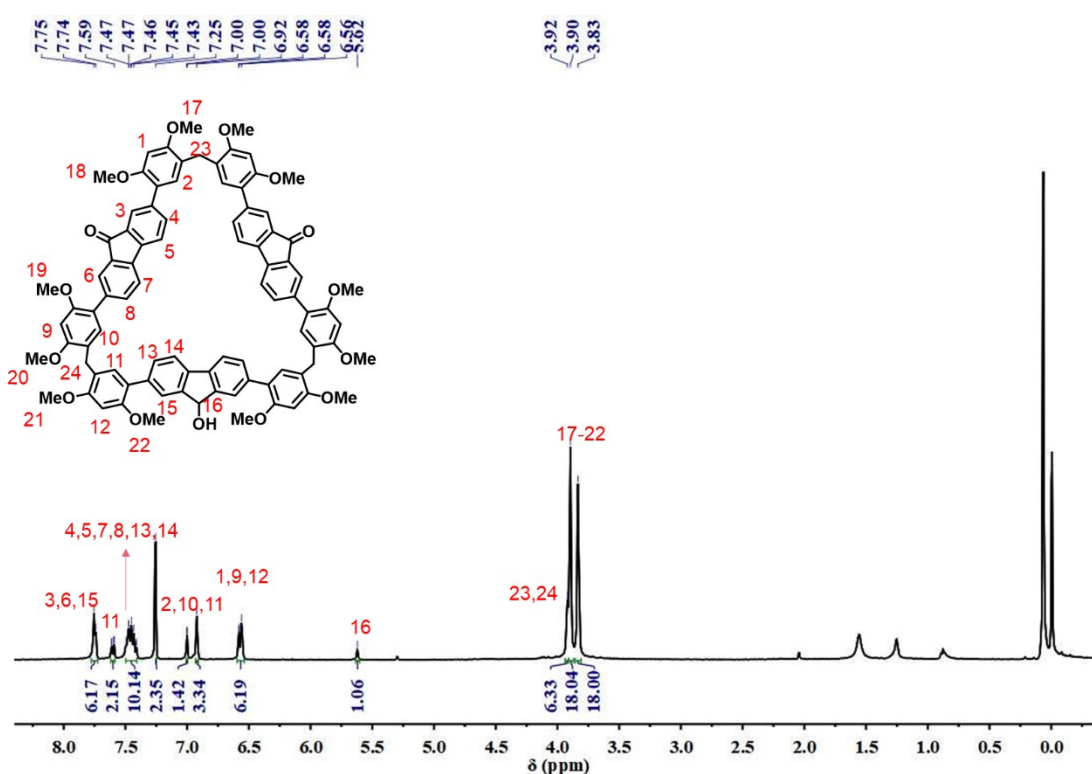

**Figure S2.** <sup>1</sup>H NMR spectrum (400 MHz, CDCl<sub>3</sub>, 298K) of T1OH.

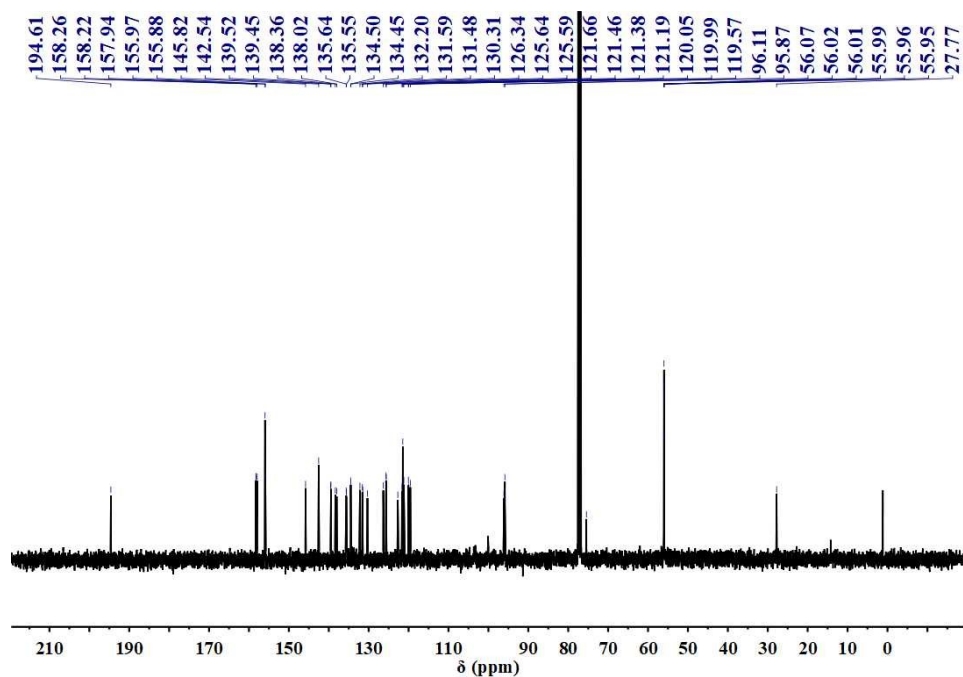

**Figure S3.**  $^{13}\text{C}$  NMR spectrum (100 MHz,  $\text{CDCl}_3$ , 298K) of **T1OH**.

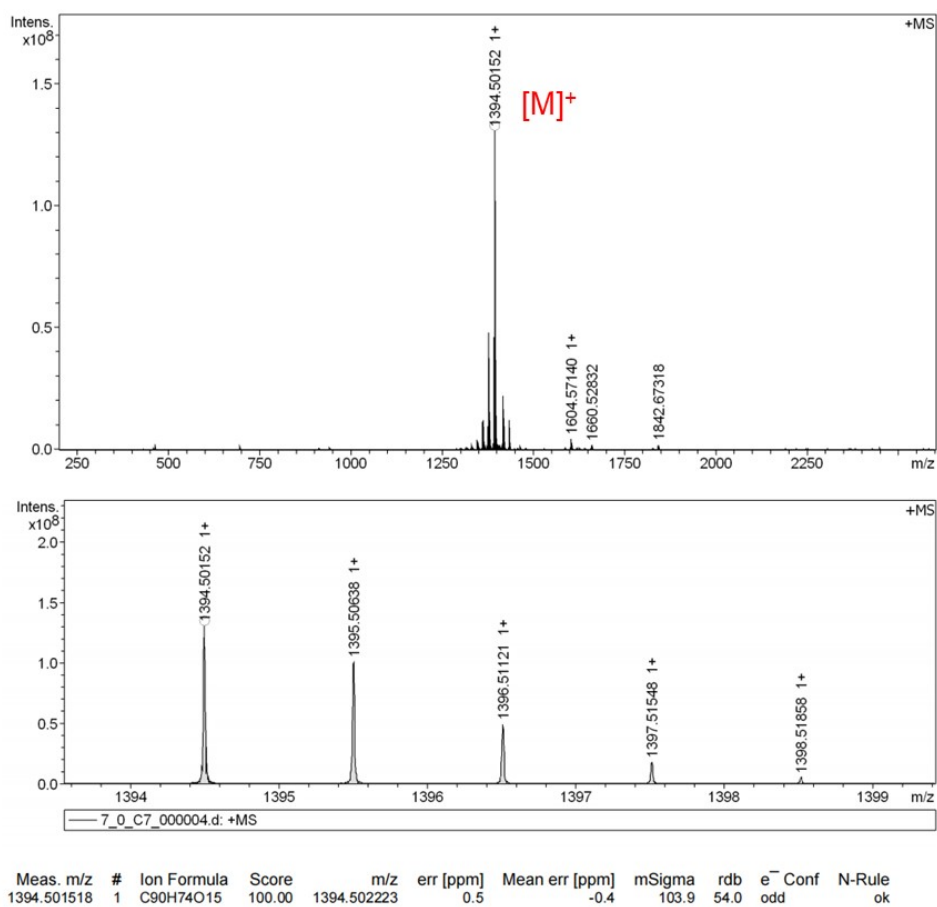

**Figure S4.** HRMS of **T1OH**.

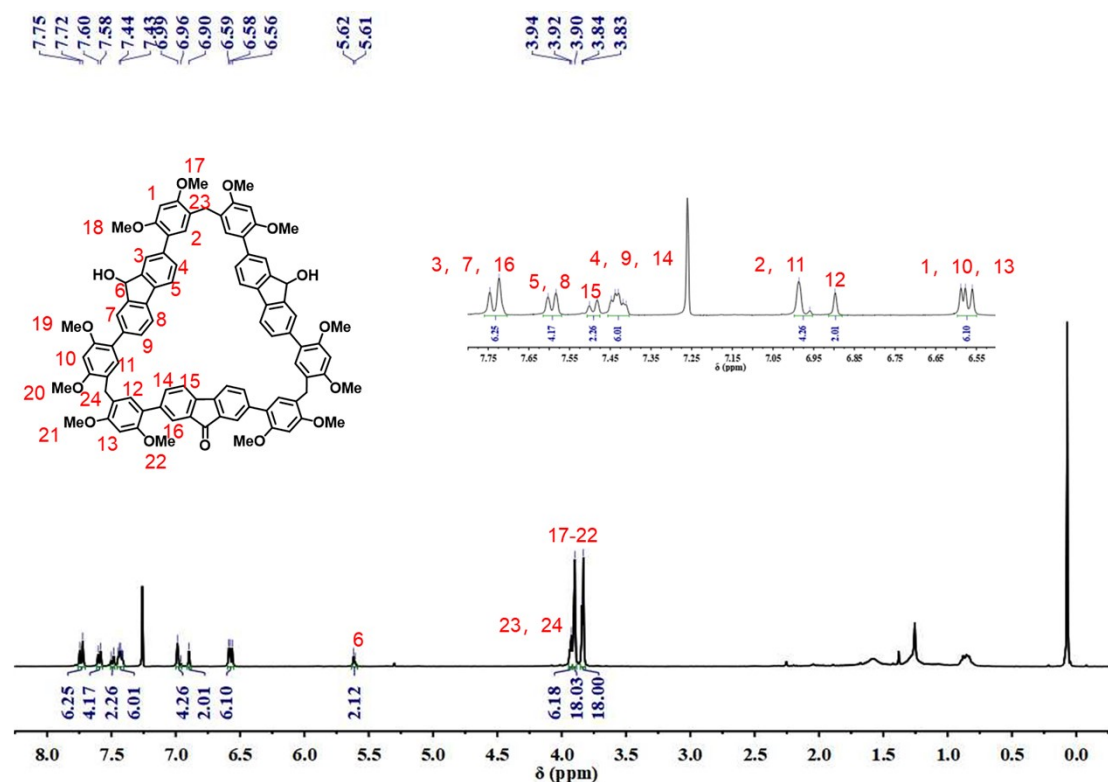

**Figure S5.**  $^1\text{H}$  NMR spectrum (400 MHz,  $\text{CDCl}_3$ , 298K) of **T2OH**.

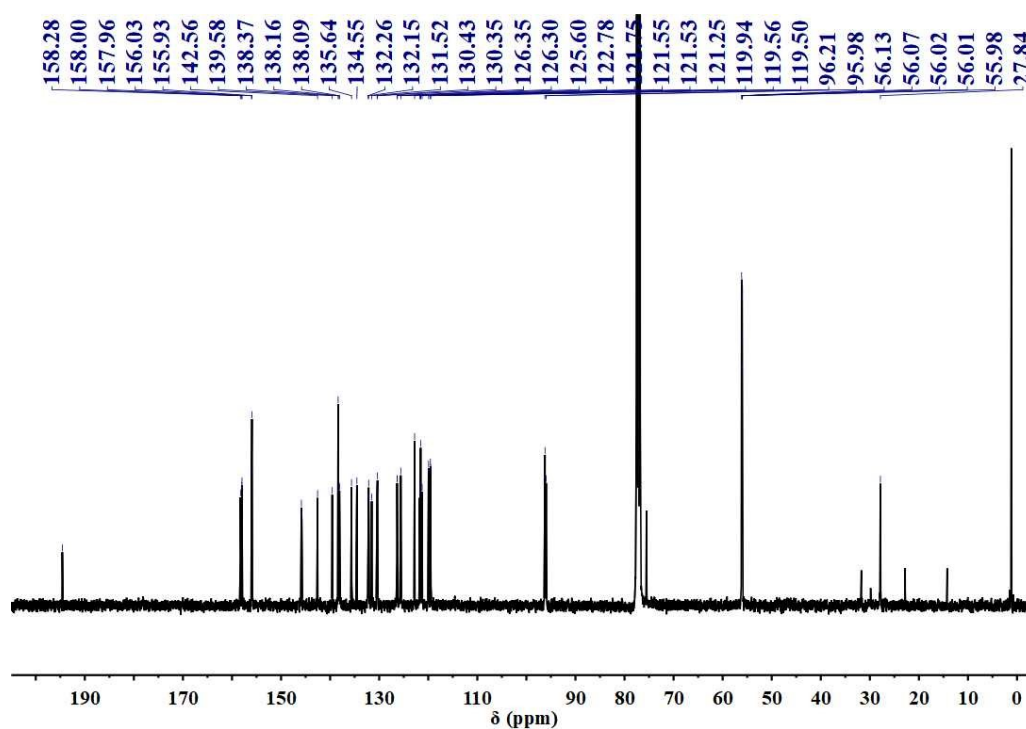

**Figure S6.**  $^{13}\text{C}$  NMR spectrum (100 MHz,  $\text{CDCl}_3$ , 298K) of **T2OH**.

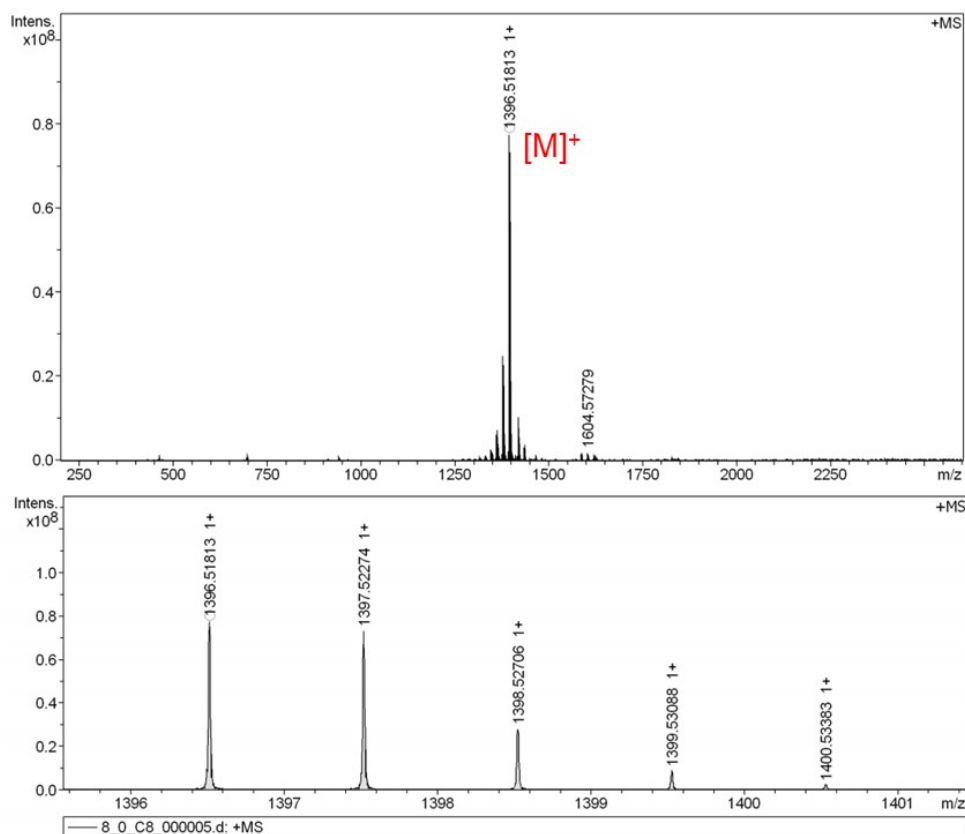

| Meas. m/z   | # | Ion Formula                                     | Score  | m/z         | err [ppm] | Mean err [ppm] | mSigma | rdb  | e <sup>-</sup> | Conf | N-Rule |
|-------------|---|-------------------------------------------------|--------|-------------|-----------|----------------|--------|------|----------------|------|--------|
| 1396.518126 | 1 | C <sub>90</sub> H <sub>76</sub> O <sub>15</sub> | 100.00 | 1396.517873 | 0.2       | -0.9           | 72.3   | 53.0 | odd            |      | ok     |

**Figure S7. HRMS of T2OH.**

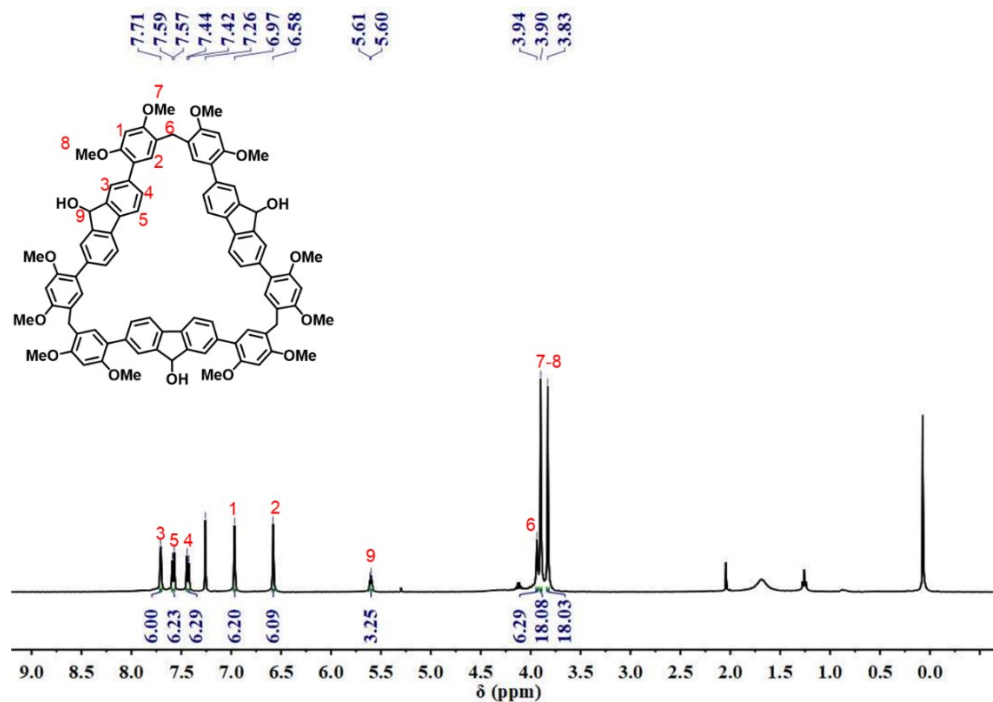

**Figure S8. <sup>1</sup>H NMR spectrum (400 MHz, CDCl<sub>3</sub>, 298K) of T3OH.**

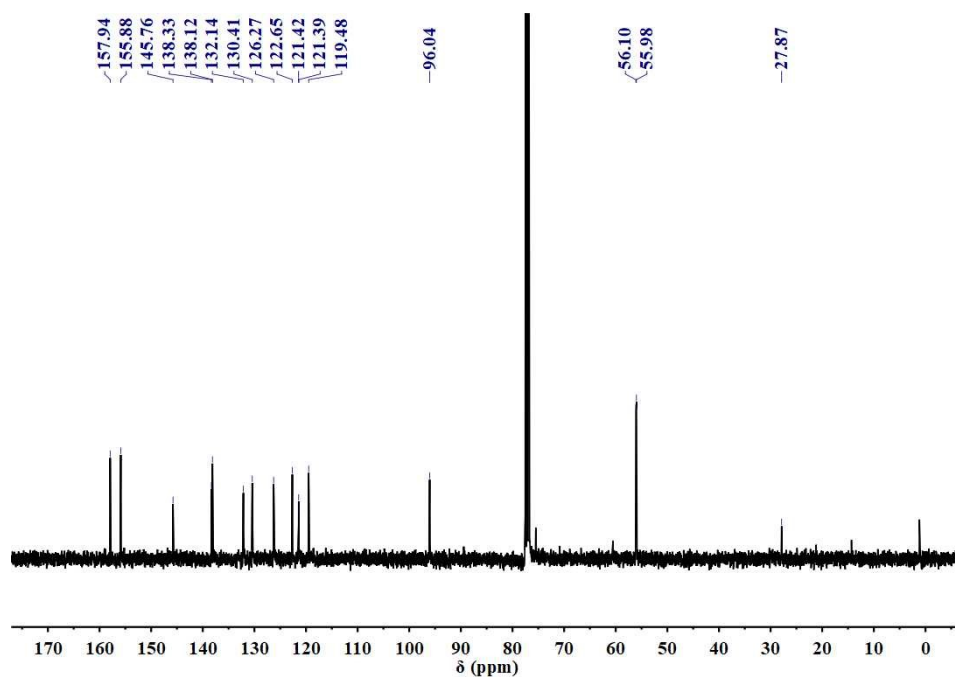

**Figure S9.**  $^{13}\text{C}$  NMR spectrum (100 MHz,  $\text{CDCl}_3$ , 298K) of **T3OH**.

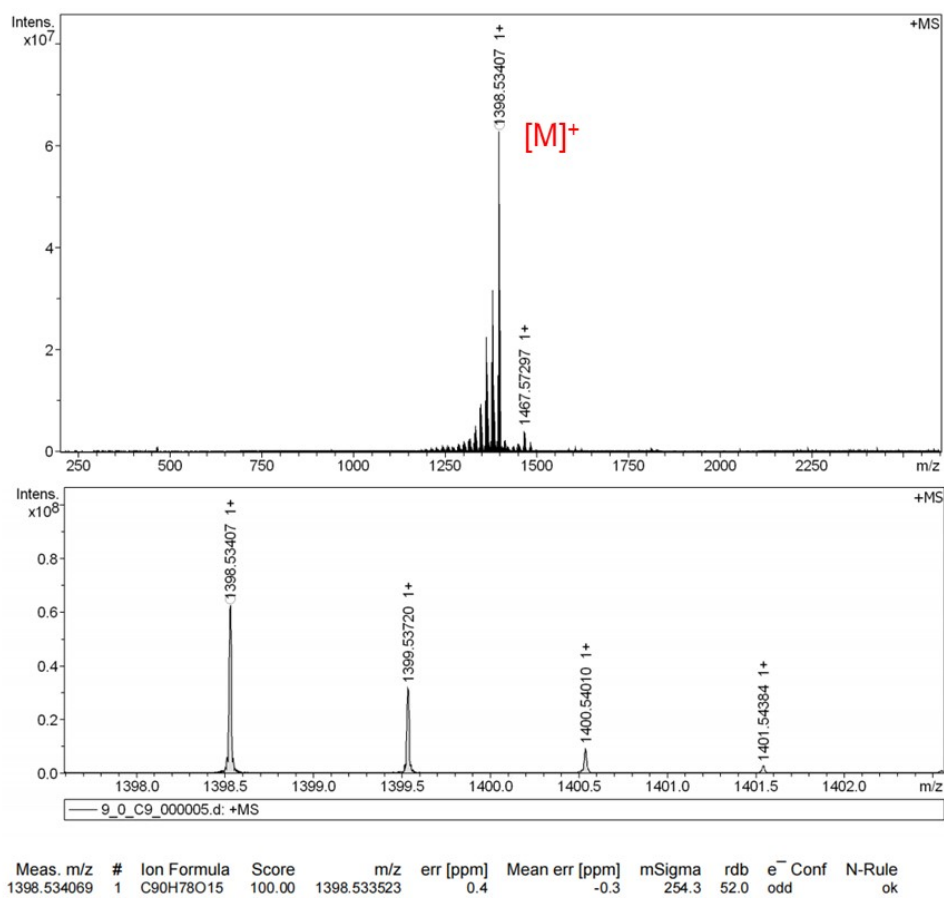

**Figure S10.** HRMS of **T3OH**.

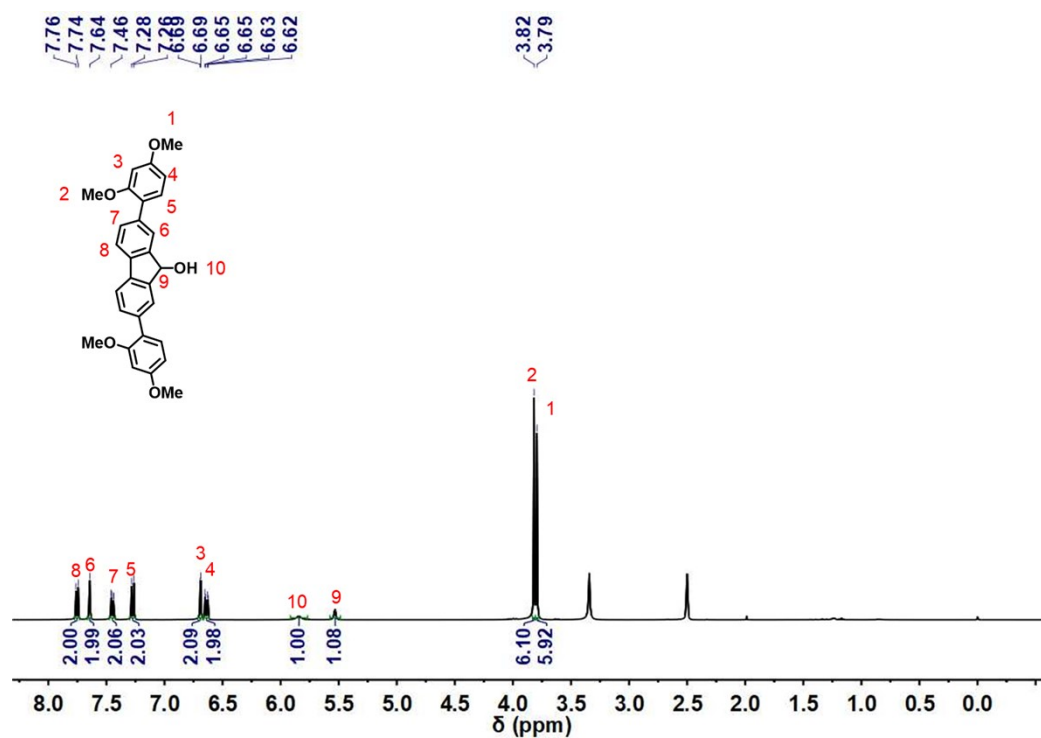

Figure S11. <sup>1</sup>H NMR spectrum (400 MHz, DMSO-*d*<sub>6</sub>, 298K) of MOH.

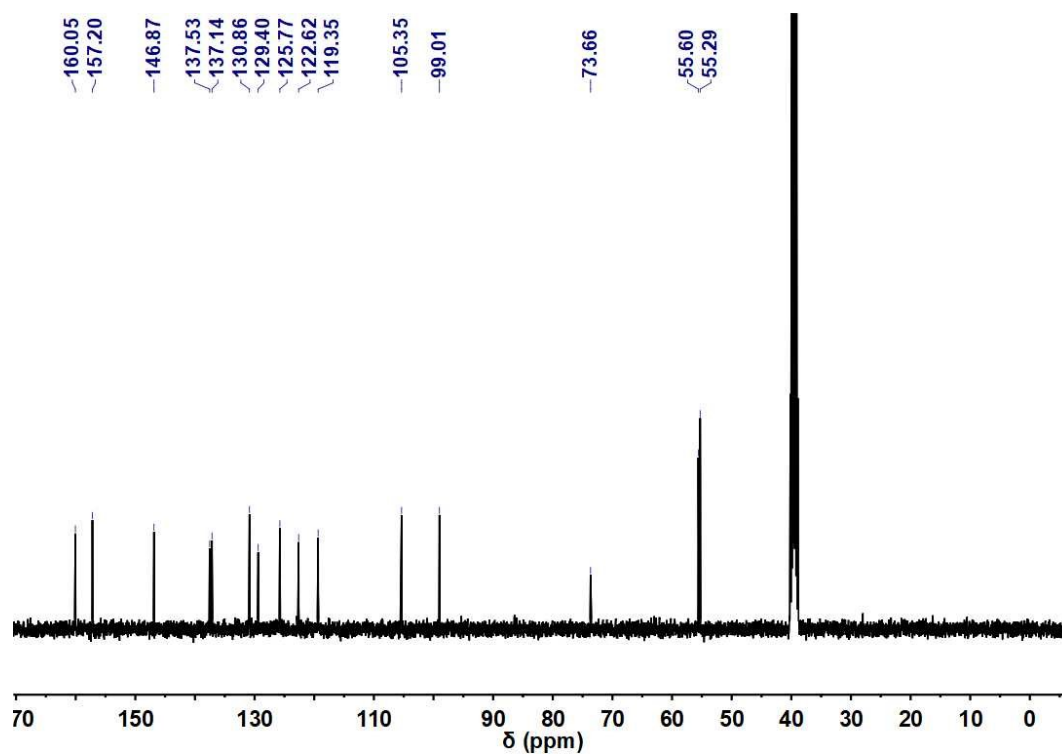

Figure S12. <sup>13</sup>C NMR spectrum (100 MHz, DMSO-*d*<sub>6</sub>, 298K) of MOH.



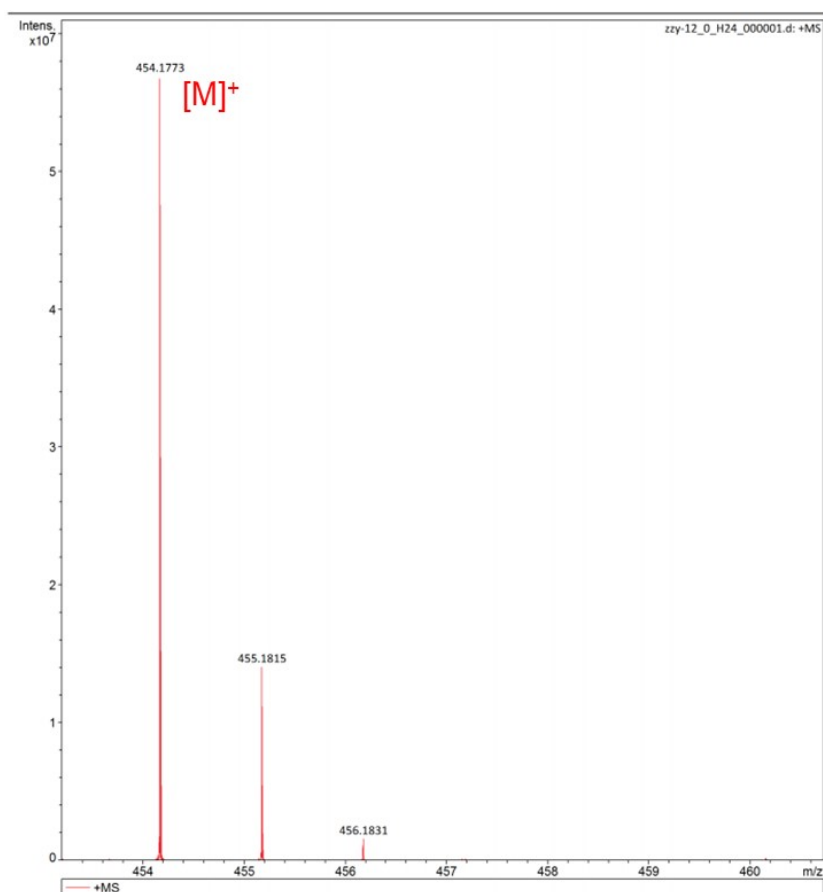

**Figure S13.** HRMS of MOH.

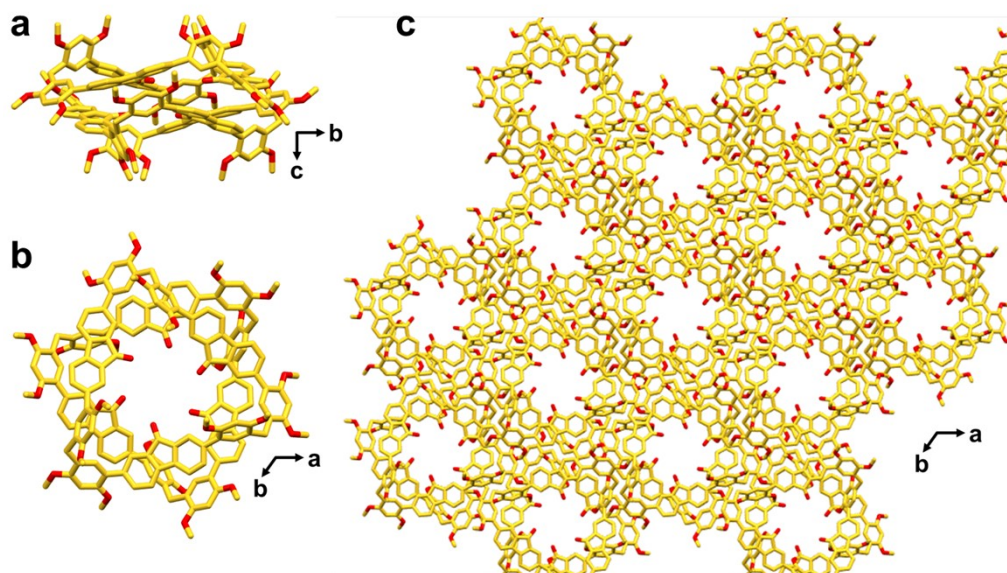

**Figure S14.** Single-crystal structures and superstructures of T1OH view along (a)  $a$  axis and (b, c)  $c$  axis. Hydrogen atoms are omitted for the sake of clarity.



**Table S4.** Crystal data of **T1OH**.

|                                             |                                                                            |
|---------------------------------------------|----------------------------------------------------------------------------|
| CCDC                                        | 2193451                                                                    |
| Name                                        | <b>T1OH</b>                                                                |
| Empirical formula                           | C <sub>102</sub> H <sub>92</sub> N <sub>6</sub> O <sub>15</sub>            |
| Formula weight                              | 1641.81                                                                    |
| Temperature / K                             | 100.00 (10)                                                                |
| Radiation / Å                               | CuK $\alpha$<br>( $\lambda$ = 1.54184)                                     |
| Crystal system                              | trigonal                                                                   |
| Space group                                 | R -3                                                                       |
| a / Å                                       | 31.2235(3)                                                                 |
| b / Å                                       | 31.2235(3)                                                                 |
| c / Å                                       | 15.7464(10)                                                                |
| $\alpha$ / °                                | 90                                                                         |
| $\beta$ / °                                 | 90                                                                         |
| $\gamma$ / °                                | 120                                                                        |
| Volume/ Å <sup>3</sup>                      | 13294.6(3)                                                                 |
| Z                                           | 6                                                                          |
| Density (calculated)                        | 1.230 g/cm <sup>3</sup>                                                    |
| $\mu$ / mm <sup>-1</sup>                    | 0.669                                                                      |
| F(000)                                      | 5196.0                                                                     |
| Crystal size (mm <sup>3</sup> )             | 0.2×0.15×0.1                                                               |
| 2 $\theta$ range / °                        | 13.012 to 151.498                                                          |
| Index ranges                                | -30 $\leq$ h $\leq$ 30<br>-37 $\leq$ k $\leq$ 37<br>-18 $\leq$ l $\leq$ 18 |
| Reflections collected                       | 18893                                                                      |
| Independent reflections                     | 5833                                                                       |
| R(int)                                      | 0.0232                                                                     |
| Data/restraints/parameters                  | 5833/9/376                                                                 |
| Goodness-of-fit on F <sup>2</sup>           | 0.971                                                                      |
| Final R indices [I>2sigma(I)]               | R <sub>1</sub> = 0.0374<br>wR <sub>2</sub> = 0.1037                        |
| Largest diff. peak/hole / e Å <sup>-3</sup> | 1.38/-0.70                                                                 |

### Section III. Photophysical properties

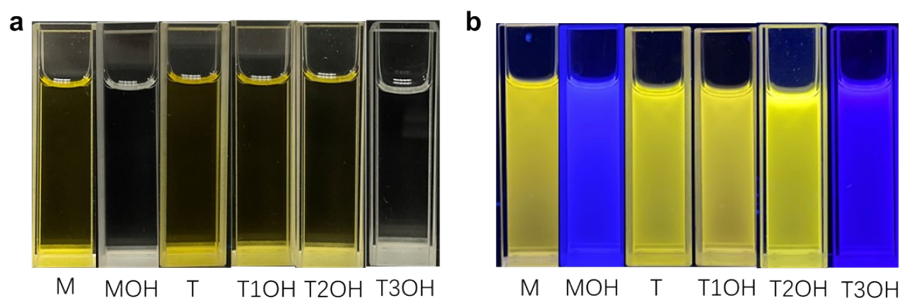

**Figure S15.** Pictures of **M**, **MOH**, **T**, **T1OH**, **T2OH** and **T3OH** in THF at (a) day light and (b) 365 nm UV lamp.

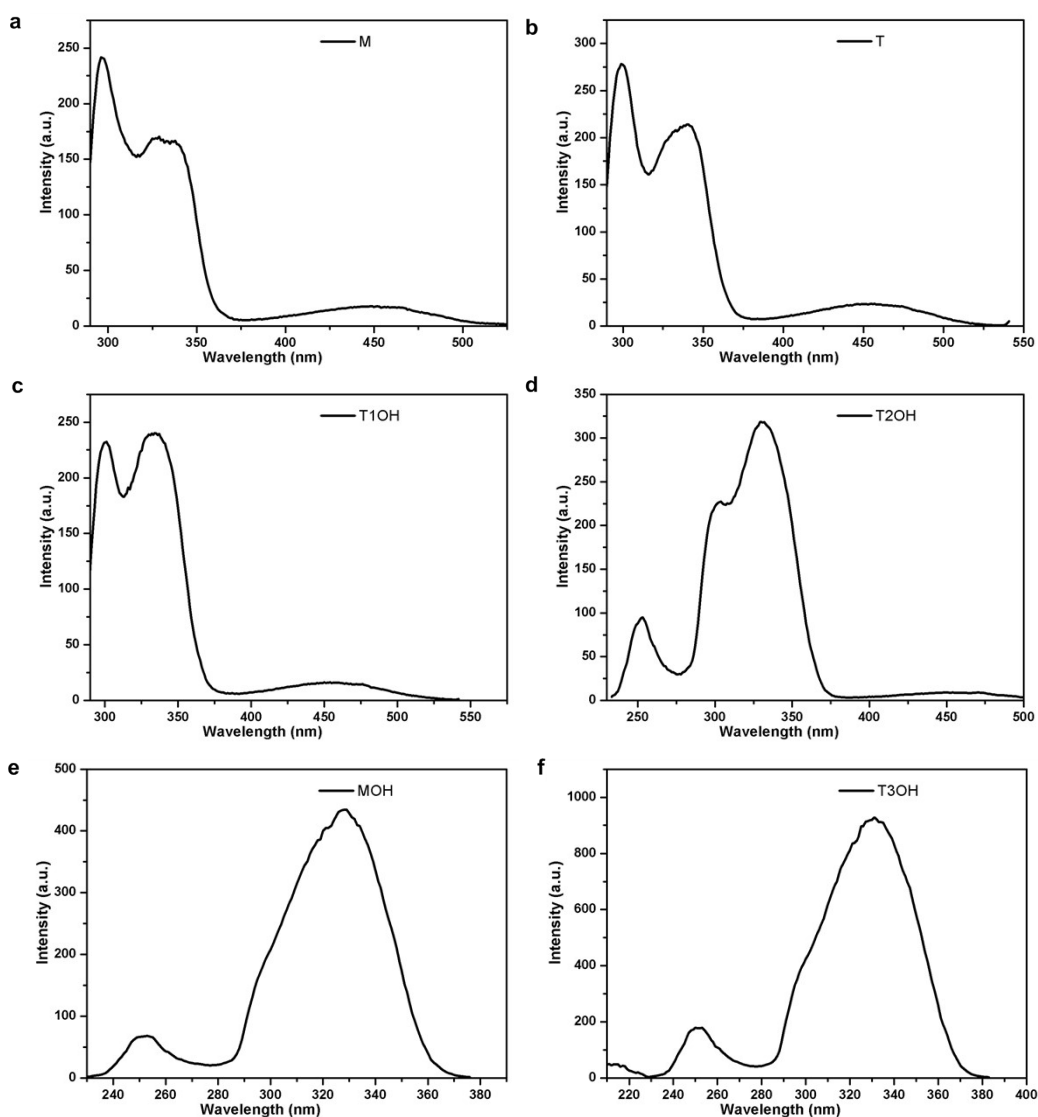

**Figure S16.** Excitation spectra of (a) **M** (@538 nm), (b) **T** (@550 nm), (c) **T1OH** (@552 nm), (d) **T2OH** (@547 nm), (e) **MOH** (@386 nm) and (f) **T3OH** (@393 nm) in THF solution ( $1 \times 10^{-6}$  mol/L).

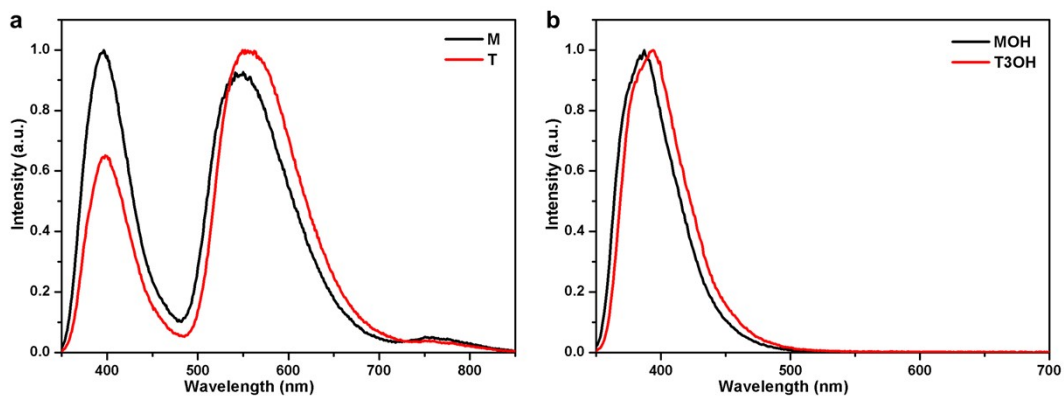

**Figure S17.** Normalized photoluminescence spectra of (a) **M** and **T** and (b) **MOH**, and **T3OH** in THF solution ( $1 \times 10^{-6}$  mol/L).

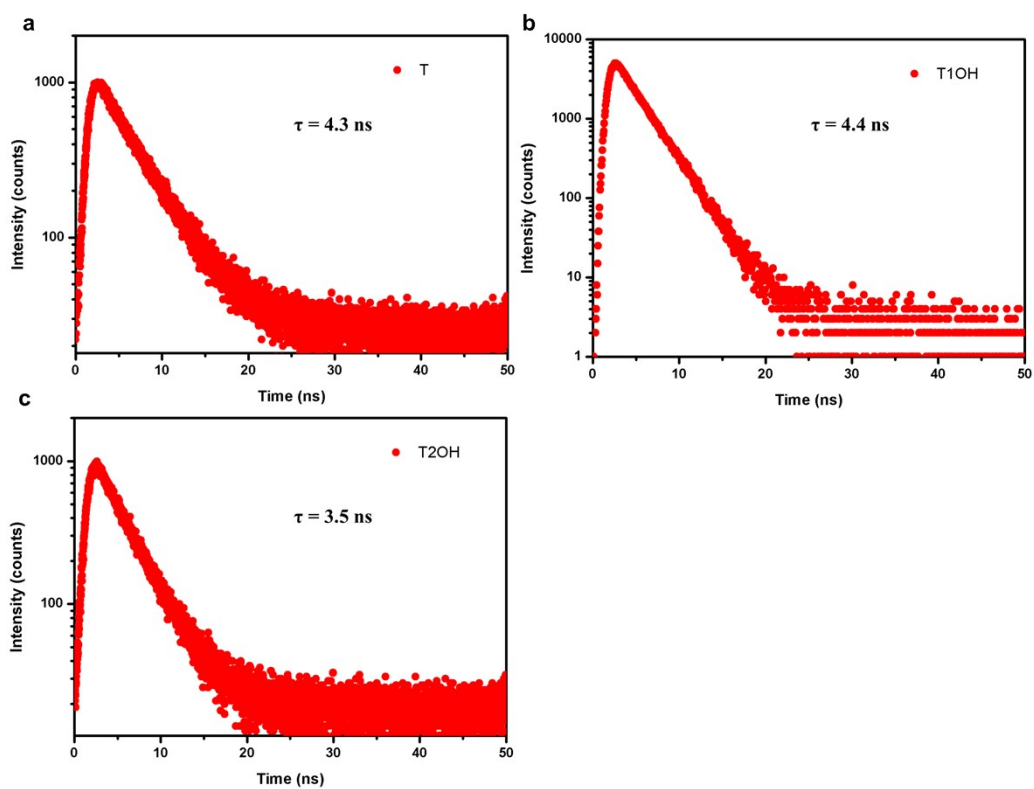

**Figure S18.** Time-resolved PL decay of **T**, **T1OH**, and **T2OH** in THF solution at 554 nm ( $1 \times 10^{-6}$  mol/L).

**Table S5.** Photophysical data of **T**, **T1OH**, **T2OH** and **T3OH** in solution and in solid state.

| Entry | Compound                     | $\lambda_F$<br>(nm) | $\tau_F$<br>(ns) | $\Phi_F$<br>(%) | $K_r^F(s^{-1})^c$  | $K_{nr}^F(s^{-1})^d$ |
|-------|------------------------------|---------------------|------------------|-----------------|--------------------|----------------------|
| 1     | <b>T</b> (L) <sup>a</sup>    | 554                 | 4.3              | 5.4             | $1.25 \times 10^7$ | $2.20 \times 10^8$   |
| 2     | <b>T1OH</b> (L) <sup>a</sup> | 554                 | 4.4              | 4.5             | $1.03 \times 10^7$ | $2.17 \times 10^8$   |
| 3     | <b>T2OH</b> (L) <sup>a</sup> | 554                 | 3.5              | 8.0             | $2.31 \times 10^7$ | $2.63 \times 10^8$   |
| 4     | <b>T3OH</b> (L) <sup>a</sup> | 393                 | 1.3              | 40.0            | $3.10 \times 10^8$ | $4.62 \times 10^8$   |
| 5     | <b>T</b> (S) <sup>b</sup>    | 580                 | 3.4              | 1.6             | $4.74 \times 10^6$ | $2.89 \times 10^8$   |
| 6     | <b>T1OH</b> (S) <sup>b</sup> | 580                 | 1.9              | 4.0             | $2.10 \times 10^7$ | $5.05 \times 10^8$   |
| 7     | <b>T2OH</b> (S) <sup>b</sup> | 580                 | 2.3              | 1.4             | $5.98 \times 10^6$ | $4.27 \times 10^8$   |
| 8     | <b>T3OH</b> (S) <sup>b</sup> | 393                 | 7.7              | 4.2             | $5.44 \times 10^6$ | $1.24 \times 10^8$   |

a: In THF solution. b: In solid state. c: The radiative decay rate constant of fluorescence  $k_r^F = \Phi_F/\tau_F$ .

d: The nonradiative decay rate constant of fluorescence  $k_{nr}^F = (1 - \Phi_F - \Phi_P)/\tau_F$ ,  $\Phi_P = 0$ .

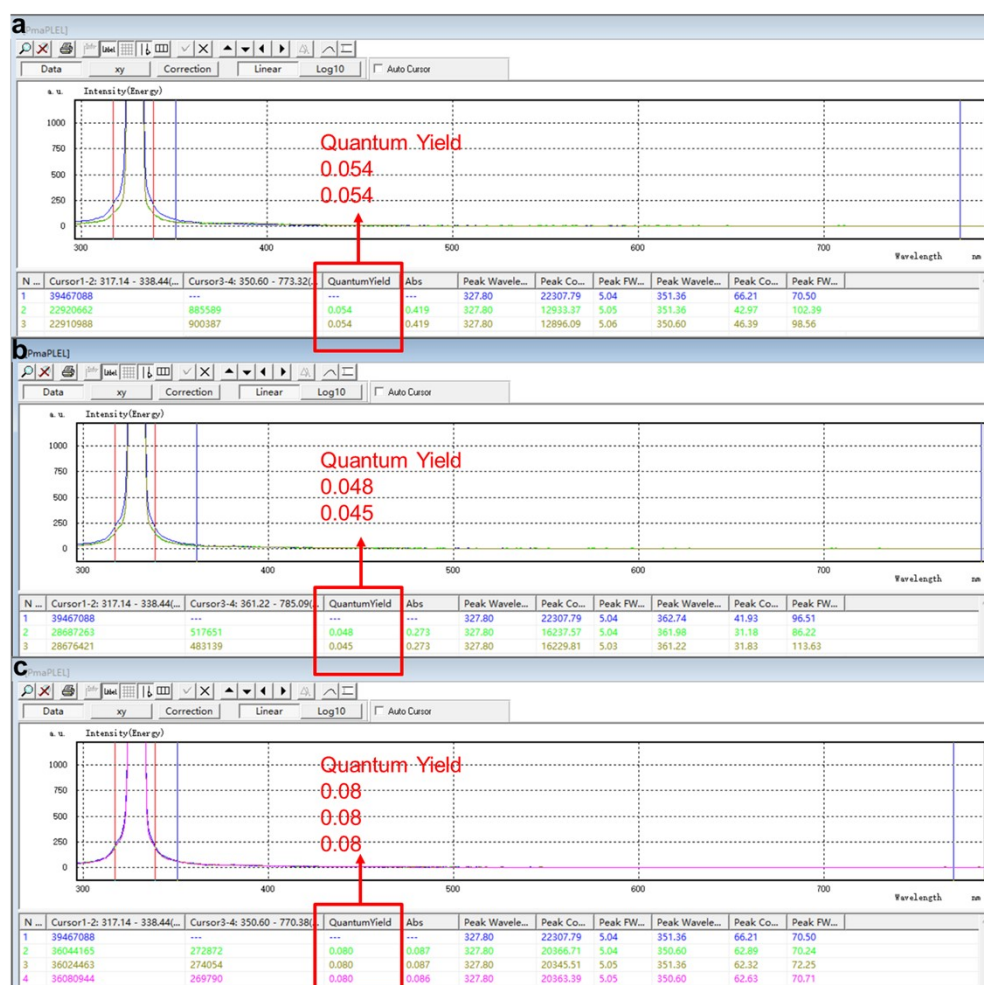

**Figure S19.** Quantum yields of fluorenone moiety in (a) **T**, (b) **T1OH**, and (c) **T2OH** in THF solution ( $1 \times 10^{-6}$  mol/L).

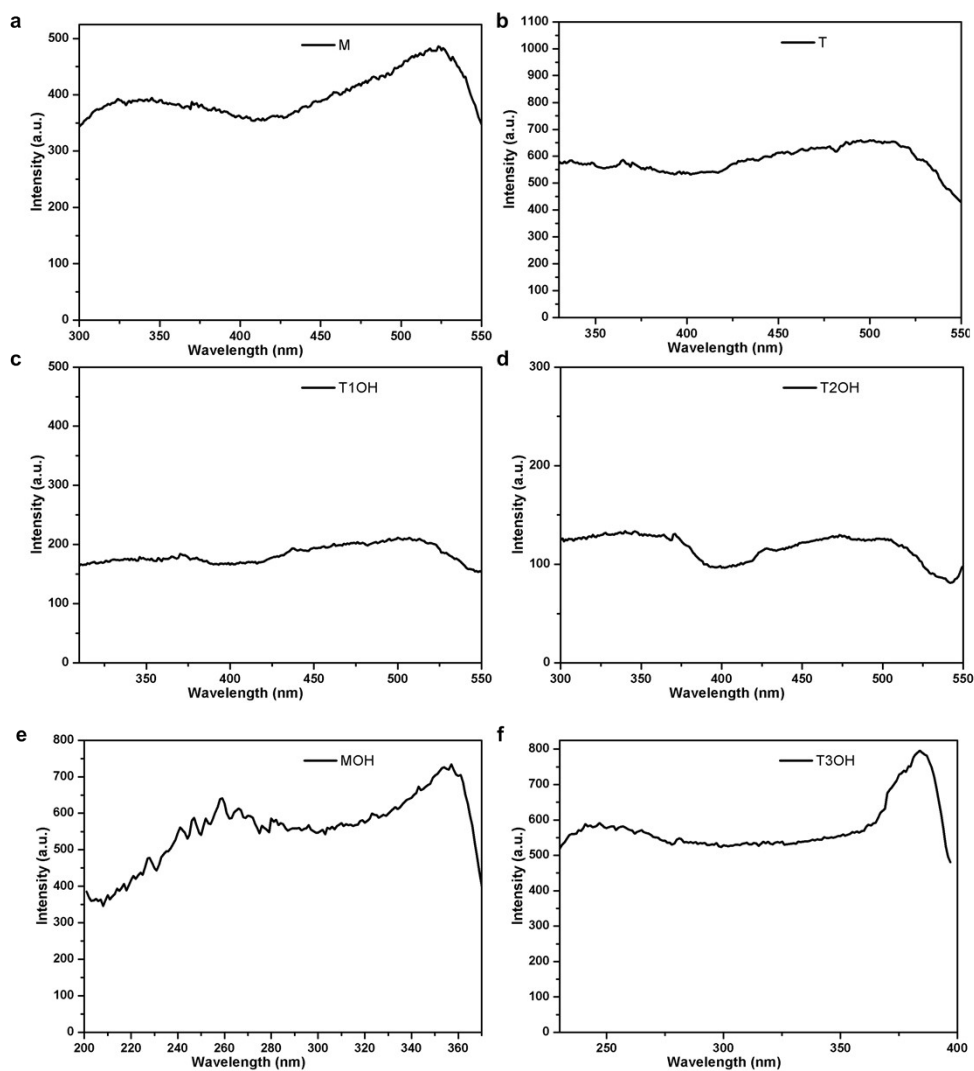

**Figure S20.** Excitation spectra of (a) **M** (@576 nm), (b) **T** (@588 nm), (c) **T1OH** (@596nm), (d) **T2OH** (@579 nm), (e) **MOH** (@382 nm), and (f) **T3OH** (@407 nm) in solid state.

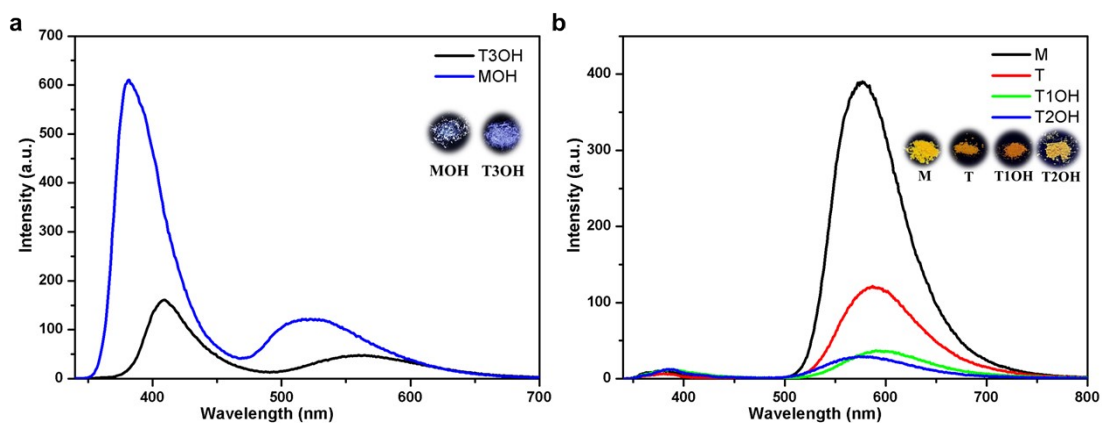

**Figure S21.** (a) Photoluminescence spectra of **MOH** and **T3OH** in solid state. (b) Photoluminescence spectra of **M**, **T**, **T1OH**, and **T2OH** in solid state.

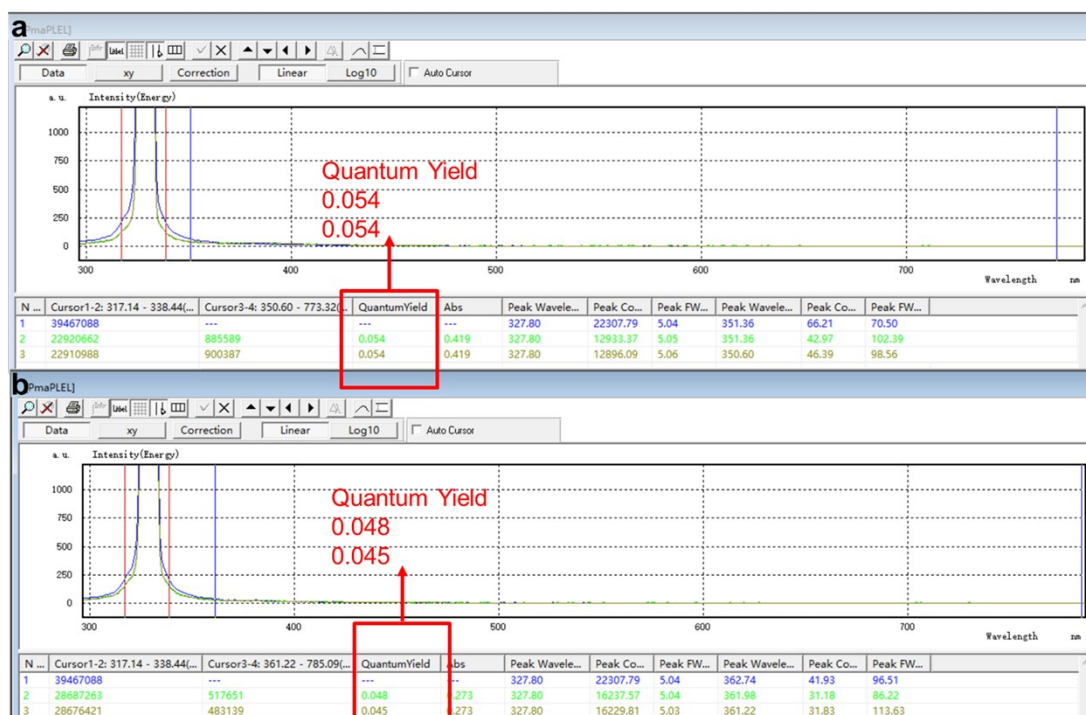

**Figure S22.** Quantum yields of (a) **T** and (b) **T1OH** in  $1 \times 10^{-6}$  mol/L THF solution.

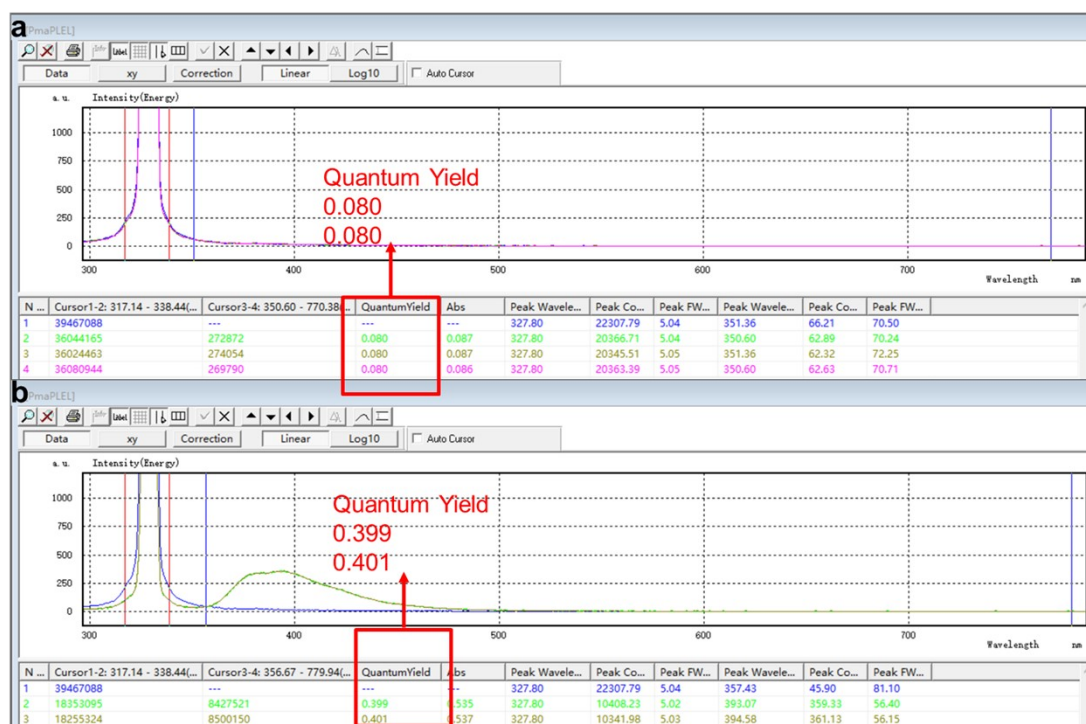

**Figure S23.** Quantum yields of (a) **T2OH** and (b) **T3OH** in THF solution ( $1 \times 10^{-6}$  mol/L).



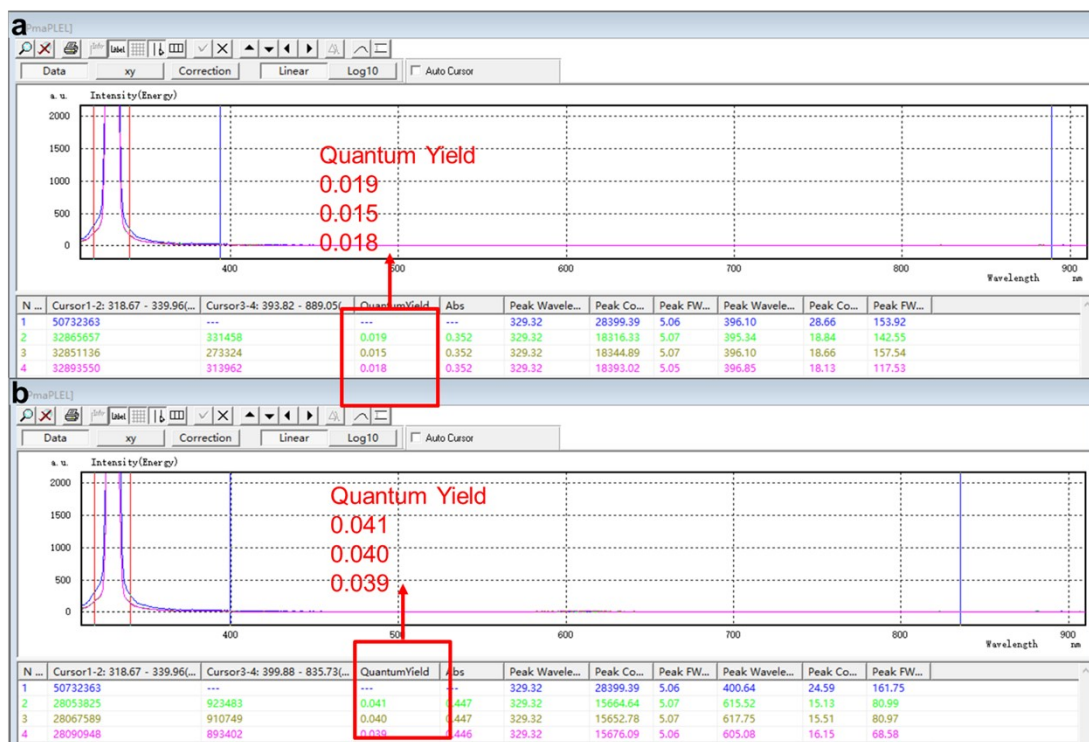

**Figure S24.** Quantum yields of (a) **T** and (b) **T1OH** in solid state.

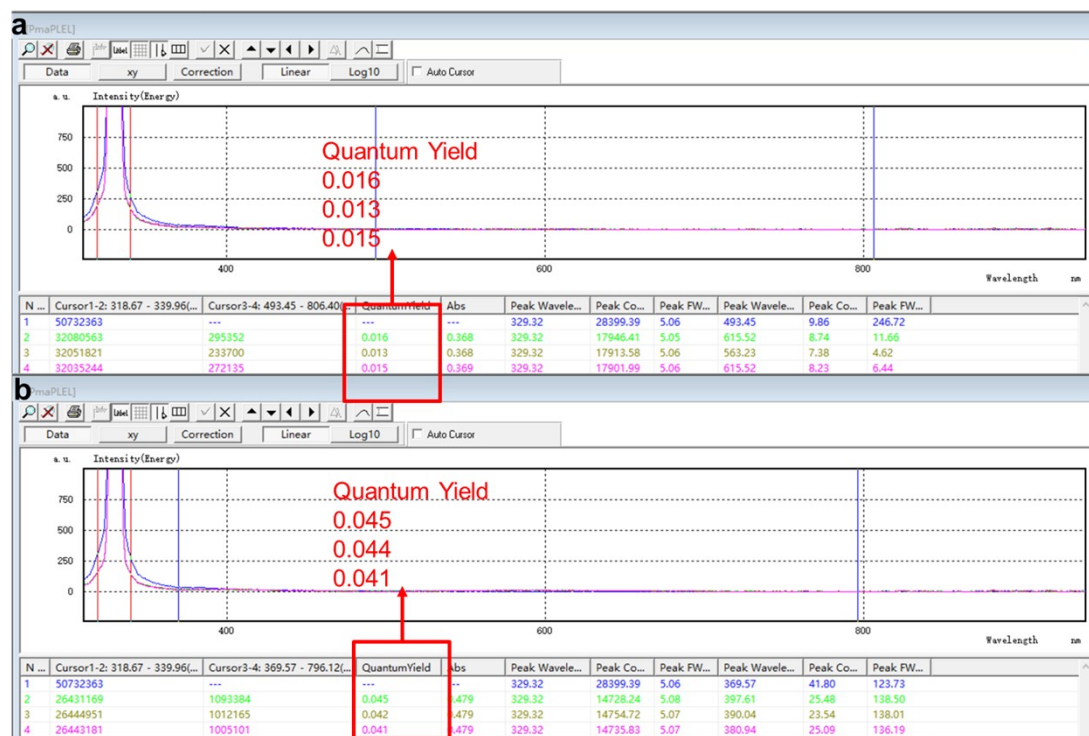

**Figure S25.** Quantum yields of (a) **T2OH** and (b) **T3OH** in solid state.

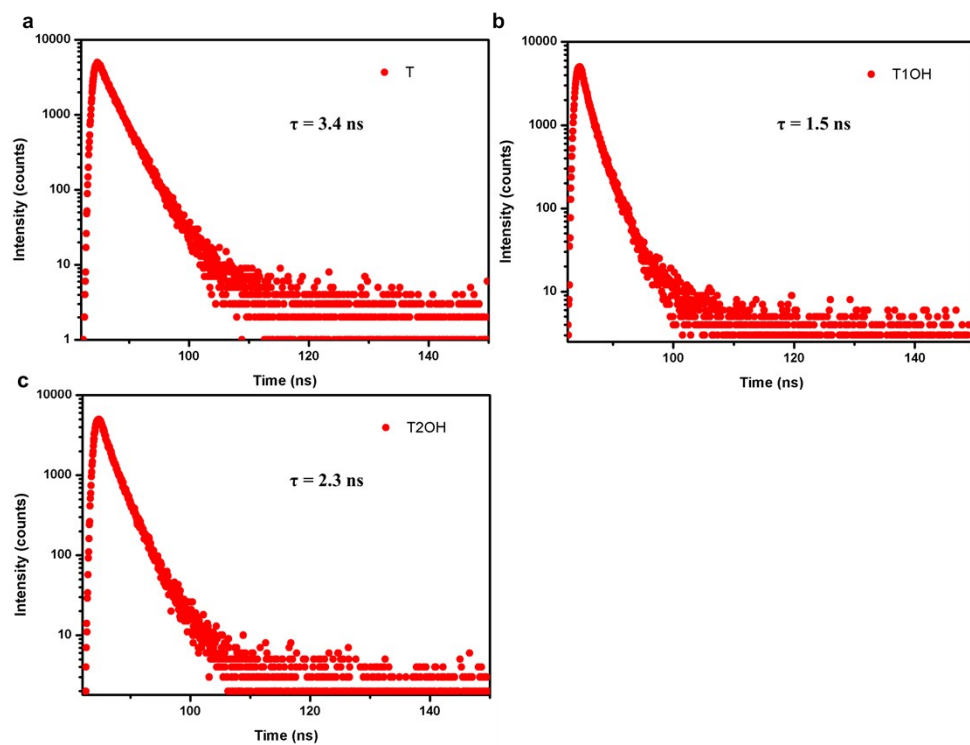

**Figure S26.** Time-resolved PL decay of T, T1OH, and T2OH in solid state at room temperature (@580nm).



## References:

- [1] MOPAC2016, James J. P. Stewart, *Stewart Computational Chemistry*, Colorado Springs, CO, USA, **2016**, [HTTP://OpenMOPAC.net](http://OpenMOPAC.net).
- [2] Stewart J. J. P., Optimization of parameters for semiempirical methods VI: more modifications to the NDDO approximations and re-optimization of parameters. *J. Mol. Modeling*. **2013**, *19*, 1-32.
- [3] Behzad, Z.; Tarifeh, B. Wet THF as a Suitable Solvent for a Mild and Convenient Reduction of Carbonyl Compounds with NaBH<sub>4</sub>. *Bull. Chem. Soc. Jpn.* **2005**, *78*, 307-315.
- [4] Gao, B.; Tan, L.-L.; Song, N.; Li, K.; Yang, Y.-W. A high-yield synthesis of [m]biphenyl-extended pillar[n]arenes for an efficient selective inclusion of toluene and m-xylene in the solid state. *Chem. Commun.* **2016**, *52*, 5804-5807.
- [5] Zhang, Z.; Luo, Y.; Chen, J.; Dong, S.; Yu, Y.; Ma, Z.; Huang, F. Formation of Linear Supramolecular Polymers That Is Driven by C $\square$ H $\cdots\pi$  Interactions in Solution and in the Solid State. *Angew. Chem. Int. Ed.* **2011**, *50*, 1397-1401.
- [6] Boinski, T.; Szumna, A. Hybrid[4]arenes with anthracene units and tuneable cavities. *New J. Chem.* **2017**, *41*, 3387-3391.
- [7] Zhang, Z.; Xia, B.; Han, C.; Yu, Y.; Huang, F. Syntheses of Copillar[5]arenes by Co-oligomerization of Different Monomers. *Org. Lett.* **2010**, *12*, 3285-3287.
- [8] Xu, K.; Zhang, Z.-Y.; Yu, C.; Wang, B.; Dong, M.; Zeng, X.; Gou, R.; Cui, L.; Li, C. A Modular Synthetic Strategy for Functional Macrocycles. *Angew. Chem. Int. Ed.* **2020**, *59*, 7214-7218.
- [9] Zhou, J.; Yang, J.; Hua, B.; Shao, L.; Zhang, Z.; Yu, G. The synthesis, structure, and molecular recognition properties of a [2]calix[1]biphenyl-type hybrid[3]arene. *Chem. Commun.* **2016**, *52*, 1622-1624.
- [10] Boinski, T.; Cieszkowski, A.; Rosa, B.; Szumna, A. Hybrid [n]Arenes through Thermodynamically Driven Macrocyclization Reactions. *J. Org. Chem.* **2015**, *80*, 3488-3495.
- [11] Li, J.; Han, X.-N.; Zhou, H.-Y.; Han, Y.; Chen, C.-F. Helic[1]tritycene[3]arene: Synthesis, Complexation, and Formation of [2]Rotaxane Shuttle. *J. Org. Chem.* **2020**, *85*, 11465-11474.
- [12] Boinski, T.; Cieszkowski, A.; Rosa, B.; Leśniewska, B.; Szumna, A. Calixarenes with naphthalene units: calix[4]naphthalenes and hybrid[4]arenes. *New J. Chem.* **2016**, *40*, 8892-8896.
- [13] Yu, C.-M.; Meng, X.; Liu, X.; Zhang, Z.-Y.; Li, C. Switchable Supramolecular Jalousie Constructed from a Fluorenone Macrocycle. *Chem. Mater.* **2022**, *34*, 358-365.
